# Supplementary material
Source: publisher figshare collection journal article supplement (https://acs.figshare.com/ndownloader/files/5098411)

Chart VIII.  $^1\text{H}$  NMR chart of compound **8** ( $\text{C}_5\text{D}_5\text{N}$ ).

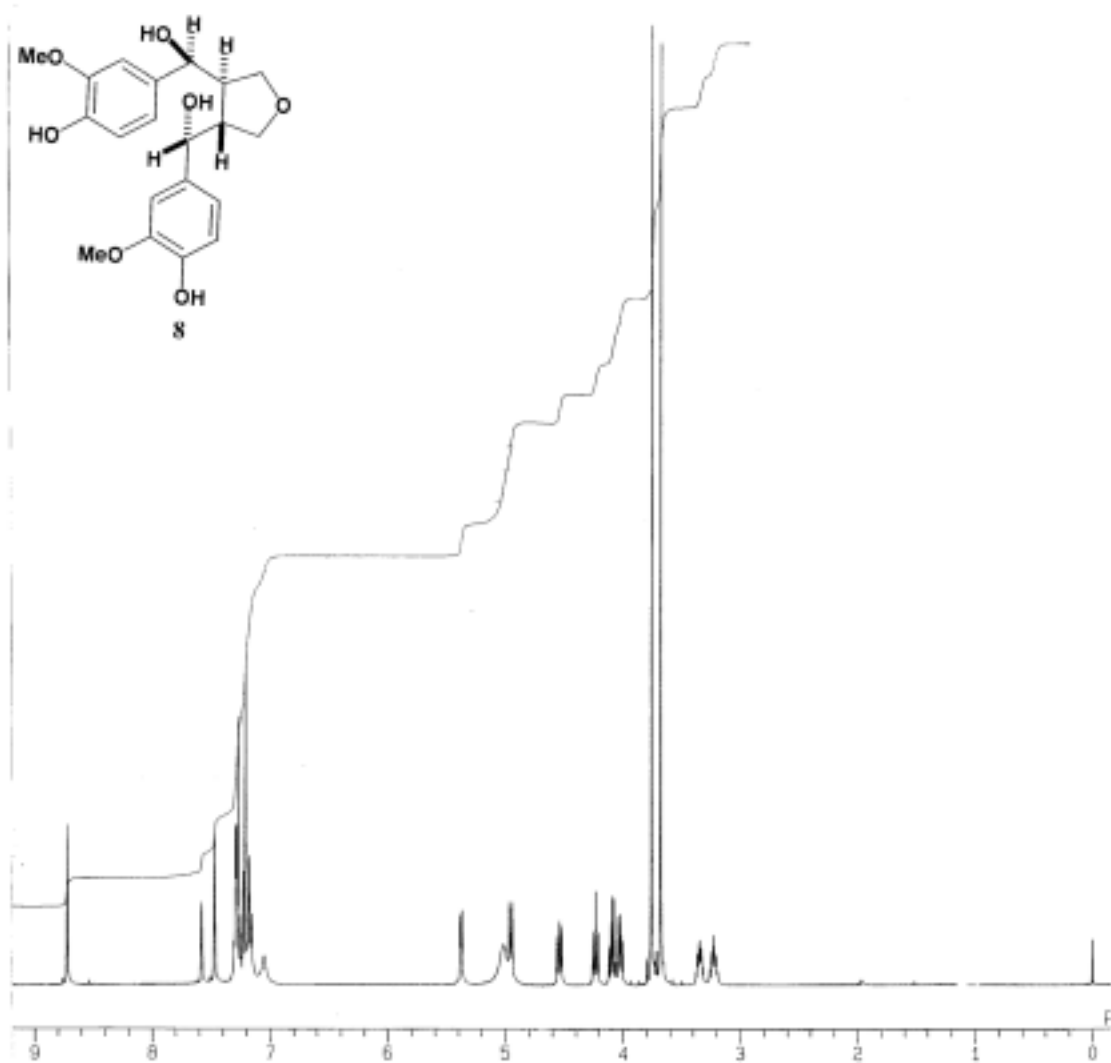

Supplement: Supplementary file 1 [file 5098411]
